## Correction: Mobilization studies in mice deficient in sphingosine kinase 2 support a crucial role of the plasma level of sphingosine-1-phosphate in the egress of hematopoietic stem progenitor cells

Mateusz Adamiak<sup>1,2</sup>, Lakshman Chelvarajan<sup>3</sup>, Kevin R. Lynch<sup>4</sup>, Webster L. Santos<sup>5</sup>, Ahmed Abdel-Latif<sup>3</sup> and Mariusz Z. Ratajczak<sup>1,2</sup>

<sup>1</sup> Stem Cell Institute at James Graham Brown Cancer Center, University of Louisville, Louisville, KY, USA

<sup>2</sup> Department of Regenerative Medicine, Warsaw Medical University, Warsaw, Poland

<sup>3</sup> Division of Cardiovascular Medicine, Gill Heart Institute, University of Kentucky, Lexington, KY, USA

<sup>4</sup> Department of Pharmacology University of Virginia, Charlottesville, VA, USA

<sup>5</sup> Department of Chemistry, Center for Drug Discovery, Virginia Tech, Blacksburg, VA, USA

**Published:** September 25, 2018

**Copyright:** Adamiak et al. This is an open-access article distributed under the terms of the Creative Commons Attribution License 3.0 (CC BY 3.0), which permits unrestricted use, distribution, and reproduction in any medium, provided the original author and source are credited.

**This article has been corrected:** The correct Acknowledgments and Funding is provided below:

### ACKNOWLEDGMENTS AND FUNDING

This work was supported by NIH grants 2R01 DK074720-10 and R01HL112788, the Stella and Henry Endowment, and the Harmonia NCN grant UMO-2014/14/M/NZ3/00475 to MZR, the Preludium NCN grant UMO-2016/23/N/NZ4/03345 to MA, R01GM121075 to KRL and WLS and the UK COBRE Early Career Program (P20 GM103527) to AAL. MA supported by the Foundation for Polish Science (FNP).

Original article: Oncotarget. 2017; 8:65588-65600. <https://doi.org/10.18632/oncotarget.19514>
